# Supplementary material for: Upregulated Proteasome Subunits in COVID-19 Patients: A Link with Hypoxemia, Lymphopenia and Inflammation
Source: MDPI journal article supplement (doi:10.3390/biom12030442), 2022-03-13
Supplement: s1 [file s1]

# Supplemental Information

## Upregulated Proteasome Subunits in COVID-19 Patients: A Link with Hypoxemia, Lymphopenia and Inflammation

Enrique Alfaro <sup>1,†</sup>, Elena Díaz-García <sup>1,2,†</sup>, Sara García-Tovar <sup>1</sup>, Ester Zamarrón <sup>1,2</sup>, Alberto Mangas <sup>1</sup>, Raúl Galera <sup>1,2</sup>, Eduardo López-Collazo <sup>3</sup>, Francisco García-Río <sup>1,2,4,\*</sup> and Carolina Cubillos-Zapata <sup>1,2,\*</sup>

<sup>1</sup> Respiratory Diseases Group, Respiratory Service, La Paz University Hospital, IdiPAZ, 28029 Madrid, Spain; [quiquealfaro23@gmail.com](mailto:quiquealfaro23@gmail.com) (E.A.); [elena.diaz.garcia.1994@gmail.com](mailto:elena.diaz.garcia.1994@gmail.com) (E.D.-G.); [sarugarto@gmail.com](mailto:sarugarto@gmail.com) (S.G.-T.); [ester.zamarron@gmail.com](mailto:ester.zamarron@gmail.com) (E.Z.); [mangasmoro@gmail.com](mailto:mangasmoro@gmail.com) (A.M.); [raulgalera@hotmail.es](mailto:raulgalera@hotmail.es) (R.G.)

<sup>2</sup> Biomedical Research Networking Center on Respiratory Diseases (CIBERES), 28029 Madrid, Spain

<sup>3</sup> Innate Immune Response Group, IdiPAZ, 28029 Madrid, Spain; [elcollazo@hotmail.com](mailto:elcollazo@hotmail.com)

<sup>4</sup> Faculty of Medicine, Autonomous University of Madrid, 28029 Madrid, Spain

\* Correspondence: [fgr01m@gmail.com](mailto:fgr01m@gmail.com) (F.G.-R.); [cubilloszapata@gmail.com](mailto:cubilloszapata@gmail.com) (C.C.-Z.);

Tel.: +34-639911718 (F.G.-R.); +34-600877179 (C.C.-Z.)

† These authors contributed equally to this work.

**Table S1:** Primers used for qPCR

|                |                |                         |
|----------------|----------------|-------------------------|
| PSMA4          | Forward primer | CTTGTGAGCAGTTGGTTACAGCG |
|                | Reverse primer | AGCCATAGTGCTTATCCCAGCC  |
| PSMA 5         | Forward primer | TGCCATGTCTCGTCCCTTG     |
|                | Reverse primer | TTTGTTCATTCAGCTTCTCCT   |
| PSMB1          | Forward primer | TGCAATGCTGTCTACAATCC    |
|                | Reverse primer | TCTCTGGTAAGACCCTACTG    |
| PSMB2          | Forward primer | GACACTGTACAGTTTGCAGA    |
|                | Reverse primer | GGAGGTTACATGATATGGG     |
| PSMB3          | Forward primer | GAGCATGGTGGCCAACCTCT    |
|                | Reverse primer | GCAGGTGCCACTGACCACAA    |
| PSMB4          | Forward primer | CGACTACGCTGATTTCCAG     |
|                | Reverse primer | GGTGTTCACAAAAGGGTTCA    |
| PSMB5          | Forward primer | TGTAGCAGCTGCCTCCAAAC    |
|                | Reverse primer | CCCTGAAATCCGGTTCCCTT    |
| PSMB6          | Forward primer | AGACTGGGAAAGCCGAGAAG    |
|                | Reverse primer | GCAGAAAATGCGGTCTGAA     |
| PSMB7          | Forward primer | AAACTGGCACGACCATCGCT    |
|                | Reverse primer | CAGCTGTCCCAGCACCACAA    |
| PSMB8          | Forward primer | ACCCCGCGTGACACTACT      |
|                | Reverse primer | GGGACTGGAAGAATTCTGTGG   |
| PSMB9          | Forward primer | CGTTGTGATGGGTTCTGATTCC  |
|                | Reverse primer | GACAGCTTGTCAAACACTCGGTT |
| PSMB10         | Forward primer | GGTTCAGCCGAACATGA       |
|                | Reverse primer | GCCCAGGTCACCCAAGAT      |
| PSMD11         | Forward primer | TAACTTCTGCTCGAACCACA    |
|                | Reverse primer | GTCGATGGAGTCATAACCCT    |
| PSMD14         | Forward primer | GTGGATATCAAACTCAGCA     |
|                | Reverse primer | TGGTTCATGTCCTAAGACCA    |
| PSME1          | Forward primer | GCGCTTGAAGCCTGAGATCA    |
|                | Reverse primer | CCTTCTCCTGGACAGCCACT    |
| PSME2          | Forward primer | CTTTCCAGGAGGCTGAGGAAT   |
|                | Reverse primer | GGAGGGAAGTCAAGTCAGCC    |
| PSME3          | Forward primer | CCAGACCTAAGCTGCCTTCT    |
|                | Reverse primer | GATAGCAGCCTCTACTGGCA    |
| HIF-1 $\alpha$ | Forward primer | TTCCAGTTACGTTCCCTCGATCA |
|                | Reverse primer | TTTGAGGACTTGGCCTTTCA    |
| NF- $\kappa$ B | Forward primer | GGTGCGGCTCATGTTTACAG    |
|                | Reverse primer | GATGGCGTCTGATACCACGG    |
| NLRP3          | Forward primer | TGCCCCGTCTGGGTGAGA      |
|                | Reverse primer | CCGGTGCTCCTTGATGAGA     |
| ASC            | Forward primer | AACCCAAGCAAGATGCGGAAG   |
|                | Reverse primer | TTAGGGCCTGGAGGAGCAAG    |
| CAS-1          | Forward primer | GGAAACAAAAGTCGGCAGAG    |
|                | Reverse primer | ACGCTGTACCCCAGATTTTG    |
| GSDMD          | Forward primer | GTGTGTCAACCTGTCTATCAAGG |
|                | Reverse primer | CATGGCATCGTAGAAGTGAAG   |
| STAT3          | Forward primer | CAGCAGCTTGACACACGGTA    |
|                | Reverse primer | AAACACCAAAGTGGCATGTGA   |
| c-FOS          | Forward primer | GTGGGAATGAAGTTGGCACT    |
|                | Reverse primer | CTACCACTACCCGCAGACT     |
| c-JUN          | Forward primer | GTCTTCTTCTTTCGCTGG      |
|                | Reverse primer | GGAGACAAGTGGCAGAGTCC    |
| 18S            | Forward primer | CGGCGACGCCATTTCGAAC     |
|                | Reverse primer | GAATCGAACCTGATTCCTCCGTC |

**Table S2.** Clinical parameters of COVID-19 patients grouped by proteasome subunits expression.

| Gene   | Lymphocytes (x10 <sup>3</sup> cells/mm <sup>3</sup> ) |             |       | PaO <sub>2</sub> /FiO <sub>2</sub> ratio |             |       | C-reactive protein (mg/L) |             |       | Ferritin (mg/mL) |             |       |
|--------|-------------------------------------------------------|-------------|-------|------------------------------------------|-------------|-------|---------------------------|-------------|-------|------------------|-------------|-------|
|        | Low                                                   | High        | P     | Low                                      | High        | P     | Low                       | High        | P     | Low              | High        | P     |
| PSMB3  | 0.885±0.345                                           | 0.889±0.430 | 0.987 | 309.0±91.03                              | 232.0±77.67 | 0.127 | 53.08±38.75               | 38.74±27.97 | 0.462 | 699.3±691.8      | 882±689.3   | 0.633 |
| PSMB5  | 0.997±0.357                                           | 0.742±0.339 | 0.213 | 290.6±98.11                              | 257.1±88.33 | 0.503 | 47.99±32.83               | 43.08±32.03 | 0.775 | 867.4±620.8      | 699.0±713.6 | 0.633 |
| PSMB6  | 0.873±0.317                                           | 0.976±0.471 | 0.623 | 302.0±85.14                              | 244.4±88.27 | 0.209 | 52.13±35.46               | 38.77±26.52 | 0.423 | 804.9±690.5      | 707.1±639.2 | 0.777 |
| PSMB7  | 0.873±0.317                                           | 0.976±0.471 | 0.623 | 302.0±85.14                              | 244.4±88.27 | 0.209 | 52.13±35.46               | 38.77±26.52 | 0.423 | 804.9±690.5      | 707.1±639.2 | 0.777 |
| PSMD11 | 0.884±0.295                                           | 0.979±0.509 | 0.675 | 295.8±80.78                              | 243.5±94.32 | 0.254 | 57.05±35.66               | 32.18±18.89 | 0.110 | 758.5±652.6      | 741.3±674.5 | 0.959 |
| PSMD14 | 0.884±0.295                                           | 0.921±0.498 | 0.858 | 295.8±80.78                              | 240.3±88.77 | 0.197 | 57.05±35.66               | 42.19±34.85 | 0.400 | 758.5±652.6      | 667.0±669.1 | 0.780 |

Clinical parameters (Lymphocyte count, PAFI ratio, C-reactive protein concentration and ferritin concentration) comparison in COVID-19 patients grouped by high or low expression of proteasome subunits (PSMB3/5/6/7 and PSMD11/14). Data are mean±standard deviation. P-values are shown. Differences were considered significant p<0.05.

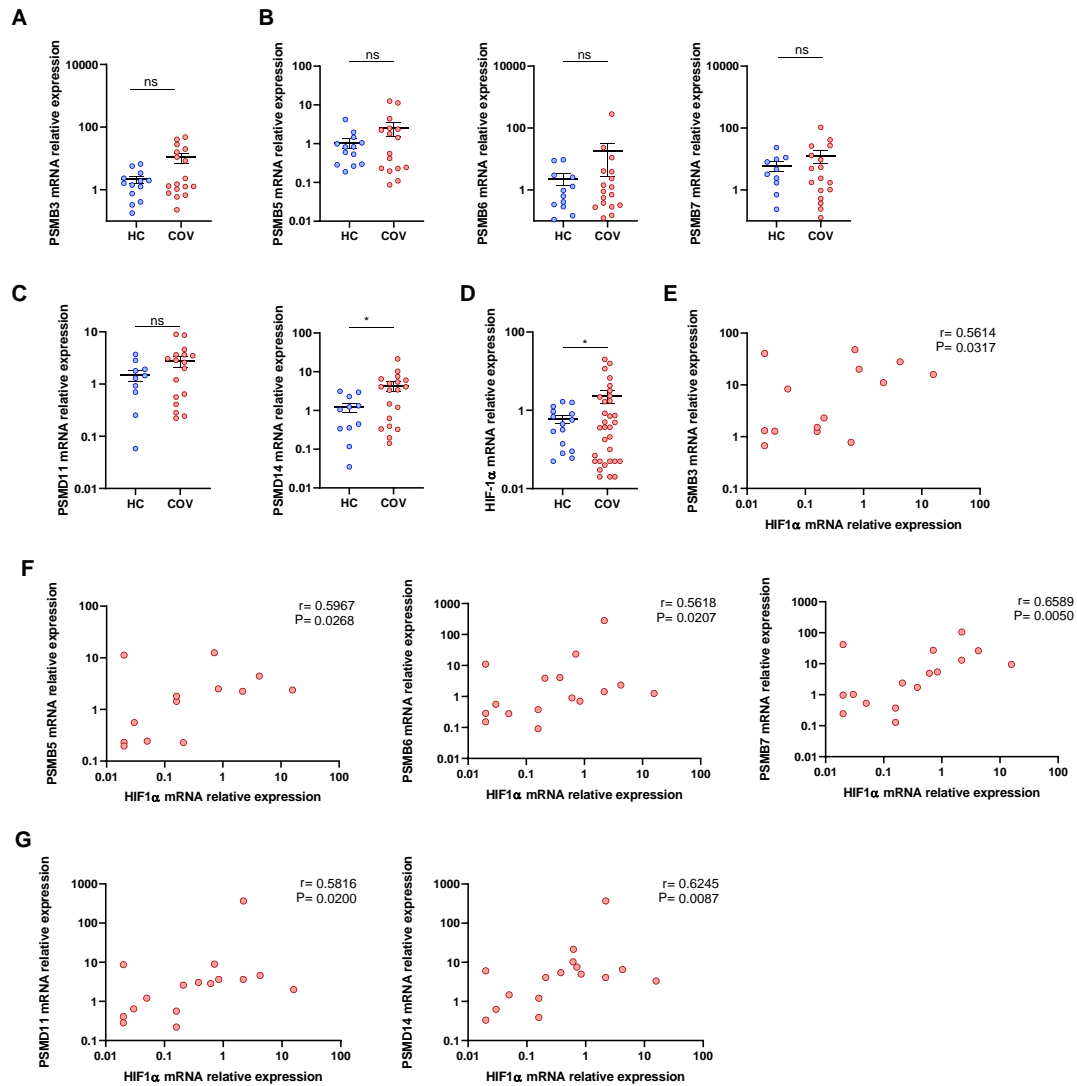

**Figure S1. Proteasome and HIF-1 $\alpha$  upregulation in COVID-19 patients.** (A-C) mRNA expression in PBMCs from healthy controls (HC) compared to COVID-19 patients (COV) of (A) 20s proteasome beta ring non-catalytic subunits: PSMB3 (HC n=13; COV n=17); (B) 20S proteasome beta ring catalytic subunits: PSMB5 (HC n=13; COV n=16), PSMB6 (HC n=12; COV n=19), PSMB7 (HC n=11; COV n=19); (C) 19S proteasome subunits: PSMD11 (HC n=10; COV n=17), PSMD14 (HC n=11; COV n=19); and (D) HIF-1 $\alpha$  (HC n=15; COV n=32). Mean differences were analysed using unpaired Student's t-test analysis with Welch's correction. Error bars: standard error of the mean. \*:p<0.05. (E-G) Correlation of hypoxia-inducible factor 1-alpha (HIF-1 $\alpha$ ) mRNA expression and mRNA expression of (E) PSMB3 (n=15), (F) PSMB5 (n=14), PSMB6 (n=17), PSMB7 (n=17); and (G) PSMD11(n=16), PSMD14(n=17). Correlations were analysed using Spearman's analysis. P-value and Spearman's correlation coefficient ( $\rho$ ) are shown.

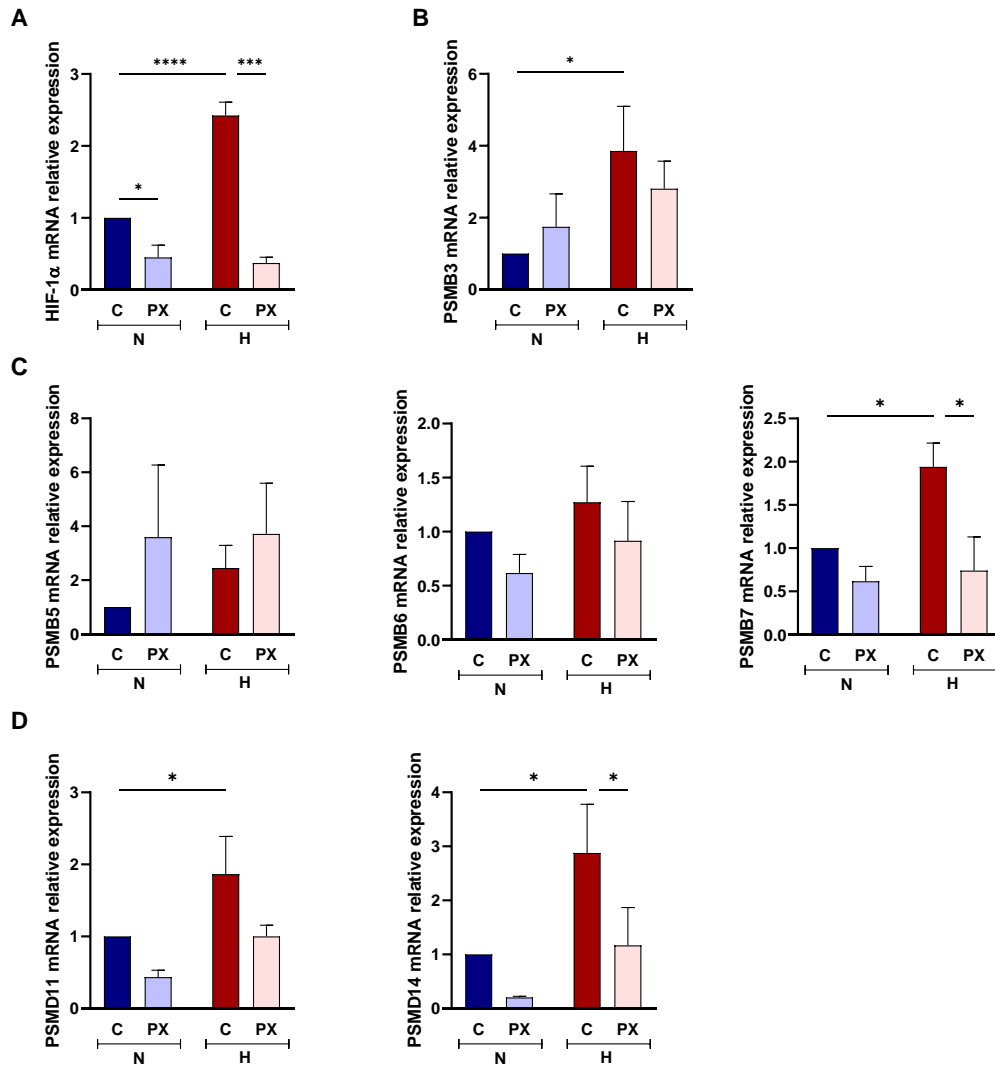

**Figure S2. *In vitro* model of the effect of hypoxia on proteasome subunits expression.** mRNA expression from healthy volunteers PBMCs (n=5) cultured in normoxia (N) or hypoxia (H) and treated with PX478 (PX) or untreated (C) of (A) HIF-1 $\alpha$ ; (B) 20S proteasome beta ring non-catalytic subunits: PSMB3; (C) 20S proteasome beta ring catalytic subunits: PSMB5, PSMB6, PSMB7; and (D) 19S proteasome subunits: PSMD11, PSMD14. Mean differences were analysed using mixed-effects analysis with Bonferroni's multiple comparison test. Error bars: standard error of the mean. \*:p<0.05, \*\*\*:p<0.001, \*\*\*\*:P<0.0001.

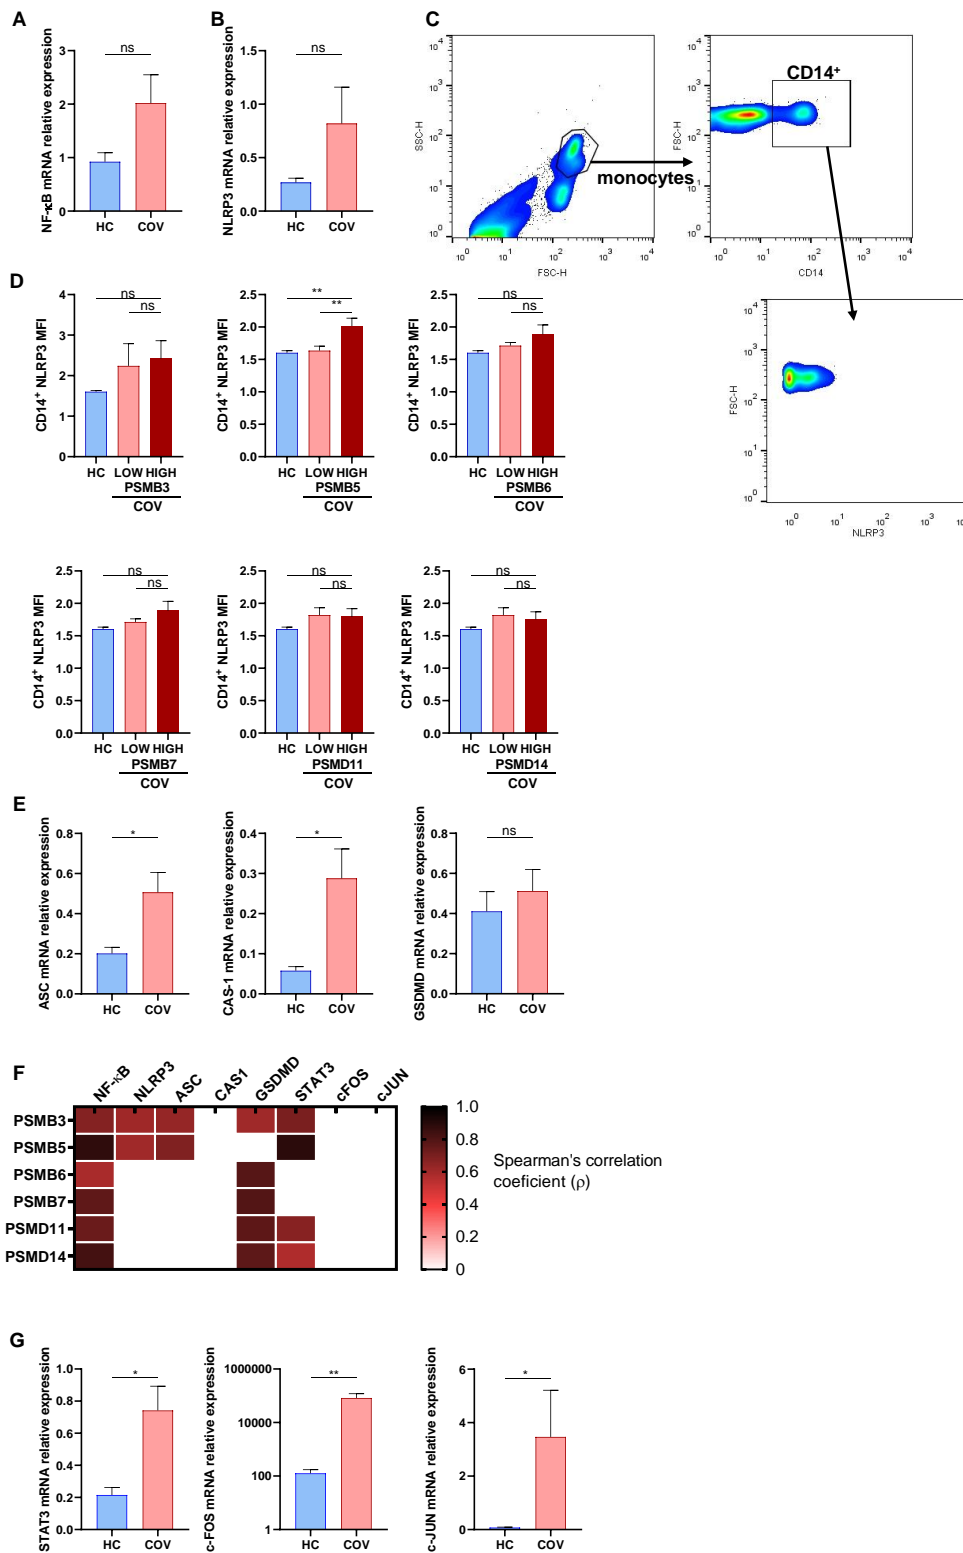

**Figure S3. Elevated mRNA expression of genes related to inflammation or STAT3 pathway in COVID-19 patients.** (A) NF- $\kappa$ B mRNA expression in healthy control (HC, n=12) and COVID-19 patients (COV, n=40), (B) NLRP3 mRNA expression in HC (n=18) and COV (n=44). (C) Monocyte gating strategy: representative plots demonstrating the used gating strategy to compare the NLRP3 expression. (D) NLRP3 expression in monocytes analysed by flow cytometry in monocytes from healthy controls (HC),

and COVID-19 patients (COV) presenting LOW or HIGH expression of proteasome subunits. Mean differences were analysed using one-way ANOVA analysis with Tuckey's multiple comparisons test. Error bars: standard error of the mean. \*:  $p < 0.05$ , \*\*:  $p < 0.01$ . **(E)** Comparison of NLRP3 inflammasome components mRNA expression in healthy control (HC) and COVID-19 patients (COV): ASC (HC,  $n=20$ ; COV,  $n=44$ ), CAS-1 (HC,  $n=20$ ; COV,  $n=44$ ) and GSDMD (HC,  $n=12$ ; COV,  $n=43$ ). **(F)** Heatmap represents Spearman's correlation coefficient ( $\rho$ ) between proteasome subunits mRNA expression and genes related to inflammation or STAT-3 pathway mRNA expression. White gaps represent non-significant correlations, on the contrary the rest of correlations are significant ( $p < 0.05$ ). **(G)** STAT3 mRNA expression from PBMCs of healthy control (HC,  $n=14$ ) and COVID-19 patients (COV,  $n=39$ ), c-FOS mRNA expression in HC ( $n=14$ ) and COV ( $n=39$ ), c-JUN mRNA expression in HC ( $n=14$ ) and COV ( $n=37$ ). Mean differences were analysed using unpaired Student t-test analysis with Welch correction. Error bars: SEM. \*:  $p < 0.05$ , \*\*:  $p < 0.01$ .

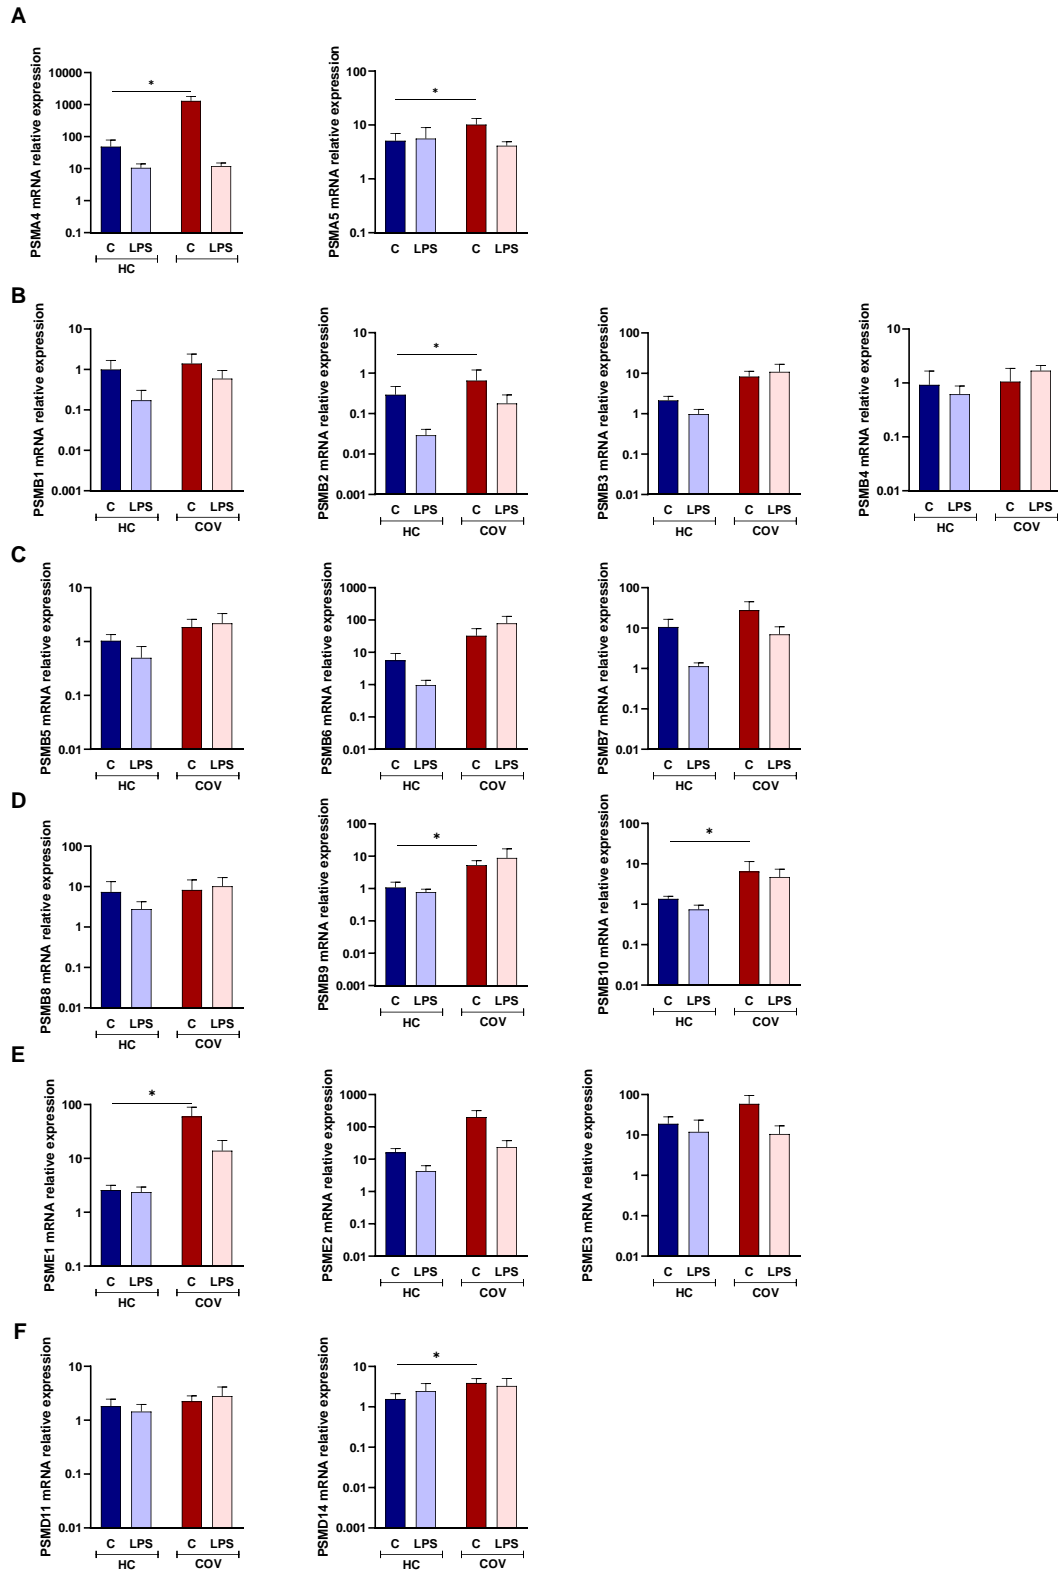

**Figure S4. *In vitro* model of the effect of inflammatory response is proteasome subunits expression.** Proteasome subunits mRNA expression in PBMCs from healthy controls (HC) (n=12) or COVID-19 patients (COV) (n=24) cultured for 16h under control conditions (C) or treated with 10ng/ml of LPS (LPS). (A) 20S proteasome alpha ring subunits: PSMA4, PSMA5; (B) 20S proteasome beta ring non-catalytic subunits: PSMB1, PSMB2, PSMB3, PSMB4; (C) 20S proteasome beta ring catalytic subunits: PSMB5, PSMB6, PSMB7; (D) 20S immunoproteasome beta ring catalytic subunits: PSMB8, PSMB9, PSMB10;



(E) 11S proteasome subunits: PSME1, PSME2, PSME3; and (F) 19S proteasome subunits: PSMD11, PSMD14. Mean differences were analysed using mixed-effects analysis with Bonferroni's multiple comparison test. Error bars: standard error of the mean. \*:p<0.05.
